# Supplementary material for: Widespread occurrence of large molecular methylsiloxanes in ambient aerosols
Source: Copernicus journal article supplement (doi:10.5194/egusphere-2025-5655), 2025-11-19
Supplement: Supplementary file 1 [file Supporting Data S1 20250202.xlsx]

## Sheet: MS_conc
Sampling_time_period	Location	Sample_type	Methylsiloxane concentrations (ng m-3)	Organic aerosols (OA) (ng m-3)	Fraction of methylsiloxanes in OA	Hydrocarbons C23-C38 concentrations (ng m-3)	Fraction of hydrocarbons C23-C38 in OA		Mean	SD
2012 Nov 26-30	Lithuania	Coastal	129.032	1503.41	0.0858263	405.201	0.269522	High emission event in coastal	0.23878	0.027183
2012 Nov30-Dec04	Lithuania	Coastal	24.7838	492.552	0.050317	112.744	0.228897
2012 Dec 04-09	Lithuania	Coastal	40.2588	1033.16	0.0389667	225.147	0.217921
2012 Dec 09-13	Lithuania	Coastal	47.0422	691.338	0.0680451	39.7714	0.0575281
2012 Dec 13-27	Lithuania	Coastal	23.3074	454.353	0.051298	31.4362	0.069189
20081230-20090107	Lithuania	Urban	60.9427	1345.23	0.0453029	46.3839	0.0344804
2009 Jan 01-16	Lithuania	Urban	56.2576	1239.06	0.0454036	58.4054	0.047137
2009 Jan 16-26	Lithuania	Urban	31.7401	835.039	0.0380103	44.8291	0.053685
2012 Dec 08-15	Lithuania	Urban	149.501	1378.92	0.108419	70.8937	0.0514124
2013 March 01-04	Lithuania	Forest	0.713902	24.3079	0.0293691	2.27651	0.0936528	Forest	0.0683852	0.0151085
2013 March 04-09	Lithuania	Forest	1.52199	68.2699	0.0222936	3.40891	0.0499329
2013 March 09-14	Lithuania	Forest	1.11011	54.2356	0.0204683	3.26404	0.0601826
2013 March 14-19	Lithuania	Forest	0.823052	33.9396	0.0242505	2.20684	0.0650227
2013 March 19-24	Lithuania	Forest	0.540314	33.7023	0.016032	2.58773	0.0767821
2013 March 24-29	Lithuania	Forest	0.933553	36.9013	0.0252986	2.38894	0.0647385
2013 March 01-04	Lithuania	Urban	8.1226	415.92	0.0195292	2.87966	0.0069236
2013 March 04-05	Lithuania	Urban	73.5699	3594.56	0.020467	242.78	0.0675411
2013 March 05-06	Lithuania	Urban	95.6776	4596.92	0.0208134	287.123	0.0624598
2013 March 06-07	Lithuania	Urban	92.8244	4499.51	0.0206299	207.807	0.0461844
2013 March 07-08	Lithuania	Urban	17.8232	908.555	0.0196171	7.55559	0.00831606
2013 March 08-12	Lithuania	Urban	17.6665	1112.04	0.0158866	24.846	0.0223428
2013 March 12-13	Lithuania	Urban	104.492	5347.75	0.0195394	256.766	0.0480138
2013 March 13-14	Lithuania	Urban	71.5652	3568.3	0.0200558	173.322	0.0485728
2013 March 14-15	Lithuania	Urban	46.8071	2382.16	0.019649	130.278	0.0546891
2013 March 15-16	Lithuania	Urban	11.992	688.838	0.0174091	11.6553	0.0169202
2013 March 18-19	Lithuania	Urban	32.2504	1920.1	0.0167962	40.3357	0.021007
2013 March 19-20	Lithuania	Urban	22.6717	1384.58	0.0163745	35.5252	0.0256579
2013 March 20-21	Lithuania	Urban	24.0776	1332.76	0.018066	38.2938	0.0287327
2013 March 21-22	Lithuania	Urban	17.4728	915.316	0.0190894	11.4675	0.0125284
2013 March 22-25	Lithuania	Urban	14.5243	726.089	0.0200035	5.88097	0.00809952
2013 March 25-26	Lithuania	Urban	32.7595	1523.92	0.0214968	31.6002	0.020736
2013 March 26-27	Lithuania	Urban	116.424	5263.86	0.0221177	356.939	0.0678095
2013 March 27-28	Lithuania	Urban	136.32	6239.83	0.0218468	396.795	0.0635906
2013 March 28-29	Lithuania	Urban	23.742	1234.39	0.0192338	33.6965	0.0272981
2013 March 02-04	Lithuania	Coastal	6.22607	225.107	0.0276582	0.951933	0.0042288
2013 March 11-14	Lithuania	Coastal	27.0502	1867.87	0.0144818	51.5771	0.0276129
2013 March 16-18	Lithuania	Coastal	17.4966	1185.73	0.014756	18.3908	0.0155102
2013 March 20-22	Lithuania	Coastal	13.3013	862.958	0.0154136	14.9626	0.0173387
2013 March 26-28	Lithuania	Coastal	21.7512	1290.92	0.0168494	40.0011	0.0309865
2013 March 06-08	Lithuania	Coastal	20.6478	1319.16	0.0156523	28.388	0.0215198
2012May17-20_Night	Netherlands	Spring	50.1535	1443.6	0.034742	1.97151	0.00136569	Rural	0.00233113	0.00095311
2012May17-20_Day	Netherlands	Spring	90.9511	1194.88	0.0761176	1.82386	0.0015264
2012May24-27_Day	Netherlands	Spring	29.6172	1743.64	0.0169859	0.777723	0.000446035
2012May24-27_Night	Netherlands	Spring	37.9701	2261.4	0.0167905	1.38328	0.000611691
2012Jun30-Jul3_Day	Netherlands	Summer	56.2005	1190.32	0.0472144	2.12055	0.00178149
2012Jun30-Jul3_Night	Netherlands	Summer	37.2031	1257.48	0.0295853	3.10677	0.00247062
2012Jul11-13_Day	Netherlands	Summer	22.735	439.869	0.0516859	0.997558	0.00226785
2012Jul11-13_Night	Netherlands	Summer	27.8966	708.082	0.0393974	1.25316	0.0017698
2012Oct16-19_Night	Netherlands	Fall	15.3332	1305.89	0.0117415	2.19145	0.00167813
2012Oct16-19_Day	Netherlands	Fall	16.6868	1066.41	0.0156476	2.16277	0.00202808
2012Nov20-26_2Midday	Netherlands	Fall	22.8309	815.569	0.0279938	2.84911	0.00349341
2012Nov20-26_1Morning	Netherlands	Fall	21.7118	987.487	0.0219869	3.60106	0.00364669
2012Nov20-26_4Night	Netherlands	Fall	29.3563	1401.64	0.0209442	4.92312	0.00351239
2012Nov20-26_3Evening	Netherlands	Fall	16.7466	1071.34	0.0156315	3.10679	0.00289991
2013Jan11-16_1Morning	Netherlands	Winter	80.5596	2043.34	0.0394255	5.12417	0.00250775
2013Jan11-16_4Night	Netherlands	Winter	82.203	2322.24	0.0353981	6.15936	0.00265233
2013Jan11-16_3Evening	Netherlands	Winter	75.1089	2005.85	0.0374448	7.58416	0.00378101
2013Jan11-16_2Midday	Netherlands	Winter	160.63	2412.33	0.0665871	6.941	0.00287731
2013Feb25-28_Night	Netherlands	Winter	38.6149	2568.44	0.0150344	6.30444	0.00245458
2013Feb25-28_Day	Netherlands	Winter	72.6105	2375.3	0.030569	5.61469	0.00236379
2011Feb27-Mar01	Netherlands	Winter	80.4156	11018.7	0.00729814	4.55827	0.000413687
2011Apr12-14	Netherlands	Spring	17.7117	819.056	0.0216245	3.27048	0.00399298
2011Apr28-May02	Netherlands	Spring	33.6833	1933.5	0.0174209	4.51371	0.00233447
2011May02-04	Netherlands	Spring	11.2524	708.172	0.0158894	2.20836	0.0031184
2011May17-19	Netherlands	Spring	4.36049	392.06	0.011122	1.49796	0.00382074
2011Jun01-06	Netherlands	Summer	16.1377	793.611	0.0203345	0.767672	0.000967314
2011Jun06-14	Netherlands	Summer	6.60359	427.953	0.0154306	0.384389	0.000898205
2011Jul07-11	Netherlands	Summer	9.24108	555.075	0.0166483	1.5244	0.00274629
2011Jul21-27	Netherlands	Summer	3.93195	283.428	0.0138728	0.641126	0.00226204
2011Aug10-17	Netherlands	Summer	16.173	600.57	0.0269294	1.41312	0.00235297
2011Aug17-26	Netherlands	Summer	14.4909	887.09	0.0163354	1.5018	0.00169295
2011Sept19-23	Netherlands	Fall	27.8575	1581.03	0.0176199	4.33393	0.00274121
2011Oct18-21	Netherlands	Fall	34.1565	1842.93	0.0185338	4.50491	0.00244443
2011Oct21-27	Netherlands	Fall	25.6362	1134.2	0.0226029	1.72901	0.00152444
2011Nov14-17	Netherlands	Fall	72.521	6429.17	0.01128	14.1336	0.00219836
2011Dec02-08	Netherlands	Winter	9.71199	587.569	0.0165291	1.25899	0.00214271
2011Dec12-15	Netherlands	Winter	6.76745	334.369	0.0202395	1.20026	0.00358962
2012Jan20-23	Netherlands	Winter	30.3405	310.943	0.0975758	0.997231	0.00320712
20120808	Brazil	Weekday	248.523	2946.23	0.084353	21.1396	0.00717515	Urban	0.0131227	0.00486911
20120809	Brazil	Weekday	209.429	5775.11	0.0362641	54.9381	0.00951291
20120810	Brazil	Weekday	179.44	4595.16	0.0390497	36.3583	0.00791229
20120811	Brazil	Weekend	145.053	2881.3	0.050343	35.0094	0.0121506
20120812	Brazil	Weekend	160.739	3833.72	0.0419277	39.3172	0.0102556
20120813	Brazil	Weekday	109.256	2401.97	0.0454859	27.2306	0.0113368
20120814	Brazil	Weekday	102.91	1984.07	0.0518683	29.5673	0.0149023
20120815	Brazil	Weekday	102.138	1685.37	0.0606029	33.6643	0.0199745
20120816	Brazil	Weekday	94.5857	2276.11	0.0415558	39.6128	0.0174037
20120817	Brazil	Weekday	136.87	2244.35	0.0609842	38.2686	0.0170511
20120818	Brazil	Weekend	88.3988	1905.91	0.0463814	27.5933	0.0144778
20120819	Brazil	Weekend	103.165	2088.17	0.0494045	29.4579	0.014107
20120820	Brazil	Weekday	177.529	2814.75	0.0630709	29.0298	0.0103134
20120821	Brazil	Weekday	134.469	2456.16	0.0547478	44.8758	0.0182707
20120822	Brazil	Weekday	118.485	2259.57	0.0524369	48.5708	0.0214955
20120823	Brazil	Weekday	94.5975	2407.18	0.0392981	22.5786	0.00937972
20120824	Brazil	Weekday	97.7823	2474.01	0.0395238	39.2644	0.0158707
20120825	Brazil	Weekend	95.2809	1962.01	0.0485629	24.4763	0.0124751
20120826	Brazil	Weekend	77.3392	2418.06	0.031984	20.0443	0.00828943
20120827	Brazil	Weekday	82.2816	1910.19	0.0430751	24.7075	0.0129346
20120828	Brazil	Weekday	80.2039	1268.68	0.0632182	21.9957	0.0173374
20120829	Brazil	Weekday	59.8492	807.877	0.0740821	16.8333	0.0208365
20120830	Brazil	Weekday	71.7085	892.189	0.0803737	18.6989	0.0209584
20120831	Brazil	Weekday	99.5278	3176.49	0.0313326	36.9295	0.0116259
20120901	Brazil	Weekend	95.7162	3641.78	0.0262828	30.8759	0.00847824
20120902	Brazil	Weekend	89.7487	4104.25	0.0218673	31.7168	0.0077278
20120903	Brazil	Weekday	63.74	1799.45	0.0354219	27.304	0.0151735
20120904	Brazil	Weekday	53.4769	1611.01	0.0331946	32.8047	0.0203628
20120905	Brazil	Weekday	76.6755	4115.86	0.0186293	23.9485	0.00581859
20120906	Brazil	Weekday	66.1004	3755.76	0.0175997	24.1094	0.00641931
20120908	Brazil	Weekend	116.125	5166.25	0.0224777	35.0003	0.00677481

## Sheet: Tunnel_temp
Methylsiloxanes	Tunnel_100°C (ng m-3)	Tunnel_150°C (ng m-3)	Tunnel_200°C (ng m-3)	Tunnel_250°C (ng m-3)	Tunnel_300°C (ng m-3)	Tunnel_350°C (ng m-3)	Note: tunnel particulate matter in Brazil
D1	0.301464	0.288286	0.312717	0.238407	0.391562	0.682844
DMSD	0.20083	0.557394	0.421768	0.327274	0.390551	0.660171
D3	1.83665	19.8005	19.6352	12.5704	9.29622	7.07673
D4	0.773456	3.4585	3.32826	2.0245	1.54521	1.34153
D5	10.2815	3.22038	2.23562	0.825632	0.54589	0.330681
D6	3.05306	2.87	1.36917	0.642261	0.53059	0.340402
D7	1.85809	1.46357	0.831396	0.392764	0.288542	0.152232
D8	1.4389	1.82238	0.462819	0.196755	0.142444	0.0637372
D9	0.879166	5.32888	0.493302	0.14047	0.14936	0.0480475
D10	0.86178	4.7434	1.34738	0.35808	0.275852	0.161027

## Sheet: BR_temp
Methylsiloxanes	Tunnel_100°C (ng m-3)	Tunnel_150°C (ng m-3)	Tunnel_200°C (ng m-3)	Tunnel_250°C (ng m-3)	Tunnel_300°C (ng m-3)	Tunnel_350°C (ng m-3)	Note: ambient particulate matter in Brazil
D1	0.221487	1.10509	1.30456	0.700249	0.607354	1.17582
DMSD	0.317225	0.680655	0.693132	0.229199	0.11149	0.26002
D3	3.2151	10.8746	7.34663	3.16566	1.14594	0.616842
D4	0.699111	2.35232	4.17712	2.01475	1.10078	0.852321
D5	3.34476	2.3922	1.4902	0.709363	0.832166	1.42086
D6	1.17767	2.08912	1.10117	0.616106	0.632875	0.83516
D7	1.87518	1.43283	1.1796	0.839328	0.858	0.926581
D8	4.62364	5.36332	0.858009	0.777812	0.939735	1.11937
D9	1.96303	7.5337	1.4868	0.909803	1.2426	1.4799
D10	1.32318	2.35809	2.48192	1.18097	0.987987	1.10068

## Sheet: All_temp
Location	Sample_type	Fraction 200 °C of methylsiloxanes in total methylsiloxanes	Fraction 350 °C of methylsiloxanes in total methylsiloxanes
Brazil	Vehicle (source)	0.693835	0.306165
Italy	Ship (source)	0.118986	0.881014
Lithuania	Coastal	0.354187	0.645813
Lithuania	Urban	0.572768	0.427232
Lithuania	Forest	0.489922	0.510078
Netherlands	Spring	0.665596	0.334404
Netherlands	Summer	0.716463	0.283537
Netherlands	Fall	0.571559	0.428441
Netherlands	Winter	0.799745	0.200255
Brazil	Weekday	0.715445	0.284555
Brazil	Weekend	0.732684	0.267316

## Sheet: Ions
Netherlands				Brazil				Lithuania
m/z	ions	Methylsiloxanes		m/z	ions	Methylsiloxanes		m/z	Methylsiloxanes
14.006				12.8				27.022
15.027				12.81				31.017
15.997				12.889				32.049
16.029				12.9				33.034
17.029				12.91				40.026
18.037				12.984				41.038
19.058				13.001				42.008
20.025				13.967				42.034
21.023				13.976				42.044
26.014				13.988				43.017
27.022	C2H2H+			14.001				43.053
28.006				14.987				44.001
28.016				15.02				44.014
29.012				15.03				44.049
29.997				15.991				44.996
30.993				16.016				45.033
31.015				17.025				45.041
31.987				18.032				46.029
32.993				18.969				46.036
33.031				19.055				46.195
33.99				20.023				46.99
35.034				21.021				47.013
36.042				26.966				47.049
37.03				26.99				47.058
37.328				27.02				47.999
38.032				28.004				49.011
39.032				28.018	CHNH+			49.027
40.027	13CC2H2H+			29.011				51.045
41.039	C3H4H+			29.997				51.054
42.035	C2H3NH+			31.018	CH2OH+			51.941
43.019	C2H2OH+			31.989				51.95
43.054	C3H6H+			32.995				51.995
44.016				33.034	CH4OH+			52.94
44.05	C2H5NH+			33.995				53.038
45.034	C2H4OH+			34.029				53.939
45.993				34.996				53.949
46.03	CH3ONH+			35.04				53.992
46.991				36.048				54.034
47.014	CH2O2H+			37.029				54.234
47.049	C2H6OH+			38.036				54.935
47.997				39.023	C3H2H+			56.049
48.008				39.035				56.933
48.602				40.012	C2HNH+			57.033
48.985				40.026	13CC2H2H+			57.049
49.024				41.038	C3H4H+			57.069
49.945				42.009				57.08
50				42.033	C2H3NH+			57.934
50.982				43.017				58.029
51.01				43.052				58.065
51.022	C4H2H+			44.012	CHONH+			59.013
51.043				45.033				60.045
51.94				45.992				60.055
51.995				46.029	CH3ONH+			60.08
52.018	C3HNH+			46.063				61.028
52.941				47.013	CH2O2H+			61.04
53.002				47.967				62.02
53.039	C4H4H+			47.994				62.028
53.939				48.017				63.019
53.992				48.981				63.031
54.035	C3H3NH+			49.013				63.044
55.039	13CC2H3NH+			50.005				63.055
55.934				51.005				63.988
56.053	C3H5NH+			51.022	C4H2H+			64.003
57.034	C3H4OH+			51.047				64.015
57.069	C4H8H+			51.994				64.969
57.935				52.015				65.025
58.031				52.935				65.036
58.066	C3H7NH+			52.979				65.074
59.049	C3H6OH+			53.003				67.018
59.931				53.037	C4H4H+			67.054
60.045	C2H5ONH+			53.995				68.025
60.08	C3H9NH+			54.033	C3H3NH+			68.05
61.029	C2H4O2H+			55.019	C3H2OH+			68.997
62.029				55.048				69.033
63.025	C5H2H+			55.935				69.044
63.931				55.987				69.068
64.003				56.022	C2HONH+			69.951
64.034				56.05	C3H5NH+			69.967
65.017	CH4O3H+			57.032				70.034
65.033				57.069	C4H8H+			70.066
65.055				57.926				71.013
66.017				57.981				71.048
66.499				57.997				71.061
67.054	C5H6H+			58.033	C2H3ONH+			71.082
67.936				58.064	C3H7NH+			71.95
68.051	C4H5NH+			59.049	C3H6OH+			72.01
68.997				60.044	C2H5ONH+			72.045
69.034	C4H4OH+			61.028	C2H4O2H+			72.057
69.068				61.981				72.08
70.035	13CC3H4OH+			62.029				72.936
70.066	C4H7NH+			62.994				72.961
71.013	C3H2O2H+			63.031				73.028
71.049	C4H6OH+			63.983				73.044
71.934				64.005	CH6ON2H+			73.064
72.047	C3H5ONH+			64.97				73.962
72.937				65.029				74.025
73.029	C3H4O2H+			65.977				74.06
73.062	C4H8OH+			66.015				74.074
73.941				66.038	C4H3NH+			74.096
74.029				67.053	C5H6H+			74.946
74.059	C3H7ONH+			68.048	C4H5NH+			75.026	DMHS+
75.028		DMHS+		69.033	C4H4OH+			75.044
75.945				69.065				75.059
76.029		DMHS+		70.034	13CC3H4OH+			75.946
77.011		DMHS+		70.063	C4H7NH+			76.04	DMHS+
77.941				71.014	C3H2O2H+			76.055
78.009				71.048	C4H6OH+			77.007
79.052	C6H6H+			72.012				77.034	DMHS+
79.939				72.044	C3H5ONH+			77.05
80.047				72.077				77.084
81.037				73.028	C3H4O2H+			77.096
81.068	C6H8H+			73.061				77.942
81.94				73.945				78.037
82.034	C4H3ONH+			74.029	13CC2H4O2H+			78.054
82.067	C5H7NH+			74.059	C3H7ONH+			79.052
83.05	C5H6OH+			74.092				80.013
83.085	C6H10H+			75.026		DMHS+		80.05
84.046	C4H5ONH+			76.027		DMHS+		81.033
84.086	13CC5H10H+			76.916				81.068
85.029	C4H4O2H+			77.015		DMHS+		82.033
85.946				78.018	CH3O3NH+			82.067
86.033	13CC3H4O2H+			79	CH2O4H+			83.012
86.059	C4H7ONH+			79.051	C6H6H+			83.049
87.045	C4H6O2H+			79.941				83.082
87.946				80.013	C4HONH+			84.045
88.048	13CC3H6O2H+			80.047				84.08
88.071	C4H9ONH+			81.035	C5H4OH+			85.028
88.952				81.066				85.044
89.029	C7H4H+			81.896				85.062
89.056	C4H8O2H+			82.038	13CC4H4OH+			85.095
89.943				82.066	C5H7NH+			85.927
90.019	C2H3O3NH+			83.048	C5H6OH+			86.025
90.948				83.079	C6H10H+			86.06
91.947				84.044	C4H5ONH+			86.071
92.055	13CC6H6H+			85.028	C4H4O2H+			87.009
93.037		DMSD		86.032	13CC3H4O2H+			87.044
93.956				86.057				87.063
94.039		DMSD		87.043	C4H6O2H+			88.042
95.02				88.043				88.065
95.034		DMSD		88.074	C4H9ONH+			88.075
95.084	C7H10H+			89.028				89.025
95.951				89.058	C4H8O2H+			89.059
96.022				89.936				89.939
96.03	CH5O4NH+			90.02	C2H3O3NH+			90.019
96.043				90.057	C3H7O2NH+			90.04
97.029	C5H4O2H+			90.949				90.055
97.1	C7H12H+			91.003	C2H2O4H+			90.948
97.951				91.05	C7H6H+			91.003
98.029	13CC4H4O2H+			92.052	13CC6H6H+			91.052
99.015				93.038		DMSD		91.958
99.041	C5H6O2H+			93.064	C7H8H+			91.977
99.079	C6H10OH+			94.038		DMSD		92.055
100.041	C4H5O2NH+			95.039		DMSD		93.037	DMSD
101.027	C4H4O3H+			95.079				93.068
101.061	C5H8O2H+			96.044				93.957
101.942				97.029	C5H4O2H+			94.039	DMSD
102.03	13CC3H4O3H+			98.025	C4H3O2NH+			94.065
102.091	C5H11ONH+			99.007	C4H2O3H+			95.048	DMSD
102.948				99.042	C5H6O2H+			95.083
103.041	C4H6O3H+			100.038	C4H5O2NH+			96.044
103.95				101.023	C4H4O3H+			97.028
104.046	13CC2H6O2N2H+			101.053				97.102
104.951				102.026	13CC3H4O3H+			98.03
105.037	13CC2H5O3NH+			102.057	C4H7O2NH+			98.058
105.938				102.087	C5H11ONH+			99.009
106.037	13CC6H4OH+			102.123				99.043
106.961				103.039	C4H6O3H+			99.076
107.054	13CC2H7O3NH+			103.07				100.04
107.081	C8H10H+			104.046				100.062
107.951				104.865				100.073
108.082	13CC2H10O2N2H+			105.033	C7H4OH+			100.111
108.959				105.066	C8H8H+			101.024
109.029	C6H4O2H+			106.034	13CC6H4OH+			101.057
109.099	C8H12H+			106.063	13CC2H8O2N2H+			101.938
109.958				107.049	C7H6OH+			102.024
110.06	13CCH8O3N2H+			107.078				102.055
110.105	13CC7H12H+			107.952				102.089
111.049	13CCH7O4NH+			108.048	13CC6H6OH+			102.126
111.96				108.109				103.04
112.046	13CC5H6O2H+			108.909				103.07
113.031	C9H4H+			109.028	C6H4O2H+			103.128
114.035	13CC8H4H+			109.061	C7H8OH+			103.944
114.048	13CC8H4H+			109.094				104.044
114.088	C6H11ONH+			110.06	13CCH8O3N2H+			105.03
115.039	C5H6O3H+			111.044	C6H6O2H+			105.066
116.042	13CC4H6O3H+			112.039				105.934
116.052	13CC4H6O3H+			113.026	C5H4O3H+			106.031
116.065				114.025	13CC4H4O3H+			106.066
116.952				114.087				107.048
117.054	C5H8O3H+			115.036	C5H6O3H+			107.082
117.085	C6H12O2H+			116.039	C4H5O3NH+			107.951
117.955				117.059				108.048
118.057	13CC4H8O3H+			118.059	13CC4H8O3H+			108.079
118.946				118.867				109.028
119.041	C8H6OH+			118.943				109.062
119.082	C9H10H+			119.046	C8H6OH+			109.098
119.952				120.044	13CC2H6O3N2H+			110.06
120.051	13CC7H6OH+			120.89				111.044
120.958				121.061	C8H8OH+			111.072
121.065	C8H8OH+			122.058	13CC2H8O3N2H+			111.117
121.958				123.043	C7H6O2H+			112.041
122.063	13CC7H8OH+			124.044	13CC6H6O2H+			112.069
123.048	C7H6O2H+			125.023	C6H4O3H+			112.993
123.95				126.053	13CCH8O4N2H+			113.024
124.045	13CC6H6O2H+			127.041	C6H6O3H+			113.056
124.959				128.04	13CC5H6O3H+			114.024
125.033	C10H4H+			129.052	C6H8O3H+			114.053
125.055	C7H8O2H+			130.053	C5H7O3NH+			114.087
125.963				130.151				115.038
126.971				131.039				115.065
127.045	C6H6O3H+			131.08	C10H10H+			116.037
127.06	C10H6H+			132.047	13CC8H6OH+			116.063
127.116				132.886				116.104
127.966				133.053	C5H8O4H+			117.055
128.048	13CC4H6O2N2H+			134.059	13CC3H8O3N2H+			117.082
128.061	C6H9O2NH+			134.826				118.06
129.055	C6H8O3H+			134.863				119.043
130.037	C5H7O3NH+			135.048	C8H6O2H+			119.08
130.049	13CC5H8O3H+			136.043	13CC7H6O2H+			119.95
130.065	13CC4H8O2N2H+			136.902				119.952
131.04	C9H6OH+			137.059	C8H8O2H+			120.043
131.101	C7H14O2H+			138.053	13CC2H8O4N2H+			120.078
132.048	13CC8H6OH+			139.042	C7H6O3H+			121.031
132.067	C5H9O3NH+			140.037	13CC6H6O3H+			121.061
133.05	C5H8O4H+			141.054	C7H8O3H+			121.095
133.067	C9H8OH+			142.051	C6H7O3NH+			122.03
134.063	13CC8H8OH+			143.038	C6H6O4H+			122.061
135.058	C5H10O4H+			144.071	13CC6H10O3H+			122.093
135.086	C9H10OH+			145.05	C6H8O4H+			123.044
135.104	C6H14O3H+			145.11	C11H12H+			123.073
135.965				146.056	13CC5H8O4H+			123.111
136.029	C3H5O5NH+			147.051	C8H6ON2H+			123.946
136.059	C4H9O4NH+			148.038	13CC3H6O4N2H+			124.043
136.07	C4H9O4NH+			149.02	C8H4O3H+			124.071
136.96				150.026	13CC7H4O3H+			124.993
137.065	13CC3H9O4NH+			151.04	C8H6O3H+			125.02
137.133	C10H16H+			152.066	13CC4H10O5H+			125.057
137.965				153.06	13CC3H9O5NH+			125.088
138.06	13CC7H8O2H+			154.054	C7H7O3NH+			126.022
139.049	C11H6H+			155.07	C8H10O3H+			126.055
140.047	13CC10H6H+			156.067	C7H9O3NH+			127.039
140.056	13CC10H6H+			157.082	C8H12O3H+			127.067
141.057	C7H8O3H+			158.088	13CC7H12O3H+			128.039
141.962				159.083	C11H10OH+			128.064
142.055	C6H7O3NH+			160.078	13CC5H10O3N2H+			129.03
142.071	C7H11O2NH+			161.057	C10H8O2H+			129.033
143.045	C10H6OH+			162.063	13CC9H8O2H+			130.024
143.058	C10H6OH+			163.046	C8H6O2N2H+			130.061
143.072	C7H10O3H+			164.042	13CC8H6O3H+			131.036
143.092	13CC6H11O2NH+			165.032	C7H4O3N2H+			131.069
143.977				166.053	13CC8H8O3H+			132.047
144.068	13CC9H6OH+			167.091	C6H14O5H+			132.075
144.081	13CC6H10O3H+			168.068	C8H9O3NH+			133.01
144.127				169.078	C11H8N2H+			133.031
145.055	C10H8OH+			170.074	C8H11O3NH+			133.058
145.124	C8H16O2H+			171.068	C8H10O4H+			133.095
146.058				172.072	13CC7H10O4H+			134.06
146.073	13CC9H8OH+			173.06	C11H8O2H+			134.065
147.057	C8H6ON2H+			173.14	C13H16H+			135.044
148.048	13CC8H6O2H+			174.056	13CC5H8O4N2H+			135.074
149.033	C5H8O5H+			175.064	C7H10O5H+			135.112
150.041	C4H7O5NH+			176.064	C6H9O5NH+			136.042
151.052	C12H6H+			177.058	C10H8O3H+			136.071
151.066	C5H10O5H+			178.059	13CC9H8O3H+			136.107
151.081	C9H10O2H+			179.07	C10H10O3H+			137.058
151.091	C6H14O4H+			180.075	13CC9H10O3H+			137.133
152.059	13CC11H6H+			181.081	C10H12O3H+			138.037
152.071	13CC11H6H+			182.078	C9H11O3NH+			138.055
152.095	C5H13O4NH+			183.091	C12H10N2H+			139.05
153.075	C12H8H+			184.077	13CC7H10O3N2H+			139.07
154.072	13CC11H8H+			185.078	C9H12O4H+			140.009
154.083	13CC11H8H+			186.074	C8H11O4NH+			140.035
155.074	C8H10O3H+			187.063	C8H10O5H+			141.021
155.09	C12H10H+			188.066	13CC7H10O5H+			141.053
156.068	C7H9O3NH+			189.062	C11H8O3H+			141.069
156.092	C8H13O2NH+			190.065	C7H11O5NH+			142.05
157.063	C11H8OH+			190.972	CH2O11H+			143.035
157.11	13CC7H13O2NH+			191.067	C11H10O3H+			143.069
157.128	C9H16O2H+			192.069	13CC10H10O3H+			144.038
158.068	13CC10H8OH+			192.968				144.077
158.089	C7H11O3NH+			193.09	C11H12O3H+			145.033
158.149	C9H19ONH+			194.082	13CC5H12O5N2H+			145.051
158.162	13CC9H20OH+			195.096	C7H14O6H+			146.058
158.919				196.087	C10H13O3NH+			147.045
159.049	C10H6O2H+			197.09	C10H12O4H+			147.077
159.062	C7H10O4H+			198.075	C9H11O4NH+			148.019
159.131				199.042	C5H10O8H+			148.041
159.142	C9H18O2H+			200.051	C8H9O5NH+			148.063
160.064	C6H9O4NH+			201.075	C5H12O8H+			149.023
160.918				201.168	C15H20H+			149.128
161.064	C10H8O2H+			202.074	C8H11O5NH+			150.022
161.091	C11H12OH+			203.074	C12H10O3H+			150.032
161.916				204.078	C8H13O5NH+			151.042
162.067	13CC9H8O2H+			205.078	C12H12O3H+			151.071
162.086	13CC6H12O4H+			206.078	13CC6H12O5N2H+			151.106
162.919				207.027		D3f		152.069
163.056	C6H10O5H+			208.031		D3f		153.016
163.919				209.012		D2TOHf		153.055
164.052	C5H9O5NH+			209.1	C15H12OH+			153.088
164.068	13CC4H10O4N2H+			210.013		D2TOHf		153.121
164.917				210.083	13CC10H12O4H+			154.052
165.045	C9H8O3H+			211.106	C11H14O4H+			155.067
165.071	C9H8O3H+			212.085	C10H13O4NH+			156.032
165.086	C13H8H+			213.07	C10H12O5H+			156.067
166.061	13CC8H8O3H+			214.086	13CC8H12O4N2H+			156.091
166.076	C6H15O4NH+			215.094	C10H14O5H+			157.053
166.5				215.191				157.074
167.062	C5H10O6H+			216.08	C9H13O5NH+			158.058
167.088	C13H10H+			217.097	C12H12O2N2H+			158.091
168.066	C8H9O3NH+			218.094	C9H15O5NH+			159.016
168.086	13CC12H10H+			219.078	C9H14O6H+			159.038
169.053	C8H8O4H+			220.086	C8H13O6NH+			159.069
169.075	C5H12O6H+			221.078	C12H12O4H+			159.127
169.088	C9H12O3H+			222.08	C7H20O2H+			160.072
170.058	13CC6H8O3N2H+			223.063		D3		161.058
170.09	C8H11O3NH+			224.07		D3		162.057
171.075	C12H10OH+			225.051		D2TOH		163.04
171.139	C10H18O2H+			226.055		D2TOH		163.145
171.153	C9H18ON2H+			227.079	C7H14O8H+			164.04
171.166				228.082	C10H13O5NH+			164.066
172.071	13CC7H10O4H+			229.109	C11H16O5H+			164.109
172.969				229.202	13CC12H25O2NH+			165.023
173.069	C10H8ON2H+			230.098	C10H15O5NH+			165.033
173.156	C10H20O2H+			230.213	C13H27O2NH+			165.051
174.061	13CC10H8O2H+			231.085	C10H14O6H+			165.076
174.973	CH2O10H+			232.088	C9H13O6NH+			166.046
175.05	C7H10O5H+			233.125	C14H16O3H+			166.06
175.061	C7H10O5H+			234.106	C9H15O6NH+			167.069
175.077	C7H10O5H+			235.15	C11H22O5H+			167.091
176.057	C6H9O5NH+			236.107	C9H17O6NH+			168.066
177.063	C9H8O2N2H+			237.149	C14H20O3H+			169.068
177.152	C9H20O3H+			238.106	C8H15O7NH+			170.05
177.9				239.129	C13H18O4H+			170.088
177.912				240.072	C7H13O8NH+			171.067
178.066	C6H11O5NH+			241.109	C8H16O8H+			172.069
178.088	13CC5H12O4N2H+			241.196	C18H24H+			173.045
179.069	C10H10O3H+			242.101	C11H15O5NH+			173.075
179.085	C14H10H+			243.127	C12H18O5H+			173.144
179.105	C7H14O5H+			243.217	C18H26H+			174.055
179.119	C10H14ON2H+			244.112	C11H17O5NH+			174.082
179.908				244.223	13CC17H26H+			175.07
180.076	13CC9H10O3H+			245.11	C11H16O6H+			176.07
180.093	13CC13H10H+			246.105	C10H15O6NH+			177.056
180.913				247.142	C14H18O2N2H+			177.16
181.081	C10H12O3H+			248.093	C9H13O7NH+			178.059
181.1	C14H12H+			249.157	C19H20H+			179.075
182.077	C9H11O3NH+			250.095	C9H15O7NH+			180.076
183.097	C10H14O3H+			251.163	C15H22O3H+			181.068
184.08	C9H13O3NH+			252.075	C8H13O8NH+			182.076
184.099	C9H13O3NH+			253.101	C13H16O5H+			183.075
185.084	C9H12O4H+			253.177	C15H24O3H+			184.038
185.099	C13H12OH+			254.107	13CC12H16O5H+			184.069
185.176	13CC10H21ONH+			255.112	C16H14O3H+			185.062
185.19	C12H24OH+			255.216	C19H26H+			186.027
186.081	C8H11O4NH+			256.107	13CC15H14O3H+			186.055
186.19	C11H23ONH+			256.237	C15H29O2NH+			188.035
187.073	C12H10O2H+			257.235	C19H28H+			188.069
187.169	C11H22O2H+			258.246	C15H31O2NH+			189.075
188.07	13CC6H10O4N2H+			259.136	C12H18O6H+			190.075
189.07	C8H12O5H+			260.116	C11H17O6NH+			190.122
189.996	13CCH4O10H+			261.151	C16H20O3H+			191.071
190.065	C7H11O5NH+			262.146	13CC15H20O3H+			191.177
190.979	C5H2O8H+			263.153	C12H22O6H+			192.069
191.06				264.129	C10H17O7NH+			192.071
191.084	C7H10O6H+			265.173	C18H20N2H+			193.047
191.168	C10H22O3H+			267.008	C11H6O8H+			193.09
191.988	13CC4H2O8H+			267.168	C19H22OH+			194.075
192.054	C6H9O6NH+			269.109	C13H16O6H+			194.087
192.081	C7H13O5NH+			269.201	C18H24N2H+			195.08
192.98	CH4O11H+			271.246	C20H30H+			196.077
193.05	C7H12O6H+			272.254	13CC19H30H+			197.073
193.066	C7H12O6H+			273.174	C14H24O5H+			198.06
193.086	C11H12O3H+			275.174	C16H22O2N2H+			199.042
193.111	C15H12H+			277.159	C13H24O6H+			200.052
194.07	C6H11O6NH+			278.113	C11H19O7NH+			200.066
194.091	C6H11O6NH+			279.159	C16H22O4H+			201.078
195.09	C7H14O6H+			280.167	13CC15H22O4H+			201.175
195.119	C8H18O5H+			281.043		D4f		202.078
196.089	C10H13O3NH+			282.045		D4f		203.082
196.111	13CC10H14O3H+			283.033		D3TOHf		204.083
196.14	13CC11H18O2H+			283.252	13CC16H31O2NH+			205.081
196.899				284.031		D3TOHf		205.191
197.087	C10H12O4H+			285.021	C11H8O9H+			206.08
197.1	C10H12O4H+			285.263	C21H32H+			207.044	D3f
197.191	C13H24OH+			286.269	13CC20H32H+			207.101
197.904				286.989	C6H6O13H+			208.037	D3f
198.09	C9H11O4NH+			287.183	C15H26O5H+			208.075
198.106	C10H15O3NH+			289.197	C15H28O5H+			208.091
198.122	C10H15O3NH+			291.203	C18H26O3H+			208.097
199.062	C9H10O5H+			293.18	C17H24O4H+			209.006	D3f
199.091	C10H14O4H+			295.112	C11H18O9H+			209.078
199.104	C10H14O4H+			295.206	C21H26OH+			210.079
199.163	C12H22O2H+			296.105	C10H17O9NH+			211.081
199.195	13CC11H23ONH+			297.09		D4		212.041
199.209	C13H26OH+			297.234	C20H28N2H+			212.084
200.066	13CC8H10O5H+			298.089		D4		213.067
200.085	C9H13O4NH+			299.086		D3TOH		214.079
200.184	13CC10H22ON2H+			299.265	C22H34H+			215.091
200.203	13CC12H26OH+			300.089		D3TOH		216.082
201.083	C9H12O5H+			301.082	C9H16O11H+			217.094
201.096	C9H12O5H+			301.196	C16H28O5H+			218.045
201.19	C12H24O2H+			303.031	C11H10O10H+			218.094
202.081	13CC8H12O5H+			303.207	C18H26O2N2H+			222.056
203.082	C11H10O2N2H+			305.155	C14H24O7H+			223.066	D3
204.08	C8H13O5NH+			307.185	C14H26O7H+			223.079
205.08	C12H12O3H+			308.155	13CC13H26O7H+			224.081	D3
205.111	C9H16O5H+			309.197	C20H24ON2H+			225.076	D2TOH
205.185	C11H24O3H+			311.196	C21H26O2H+			226.058	D2TOH
206.077	13CC7H12O6H+			313.253	C22H32OH+			227.079
206.105	C8H15O5NH+			315.21	C19H26O2N2H+			228.083
207.083		D3f		317.23	C17H32O5H+			229.007
207.099	C8H14O6H+			319.235	C24H30H+			229.096
207.122	C9H18O5H+			320.323	C22H41NH+			229.208
207.144	C13H18O2H+			321.247	C20H32O3H+			230.099
207.209	C15H26H+			323.243	C16H34O6H+			231.086
208.073		D3f		325.278	C20H36O3H+			232.094
208.095	C7H13O6NH+			327.24	C21H30ON2H+			233.102
208.122	13CC11H14O3H+			329.213	C21H28O3H+			233.222
209.083		D2TOHf		331.237	C20H30O2N2H+			234.104
209.112	C8H16O6H+			333.237	C21H32O3H+			235.09
209.143	C16H16H+			335.247	C23H30N2H+			235.125
210.088		D2TOHf		337.265	C23H32N2H+			236.082
210.108	13CC14H12OH+			339.294	C21H38O3H+			236.129
210.13	13CC15H16H+			341.005	C9H8O14H+			237.103
211.095	C11H14O4H+			342.003	13CC12H8O11H+			238.058
211.12	C15H14OH+			345.282	C23H36O2H+			238.095
211.191	C12H22ON2H+			347.265	C22H34O3H+			238.244
211.218	C13H26N2H+			349.273	C22H36O3H+			239.11
212.094	C10H13O4NH+			351.293	C22H38O3H+			240.095
212.111	C11H17O3NH+			353.316	C26H40H+			241.099
212.222	13CC12H26N2H+			355.064		D5f		242.097
213.082	C10H12O5H+			356.064		D5f		243.11
213.097	C7H16O7H+			357.059		D4TOHf		243.218
213.185	C13H24O2H+			358.055		D4TOHf		244.103
213.222	C14H28OH+			359.051	C10H14O14H+			245.103
213.9				359.282	C20H38O5H+			245.222
214.082	13CC9H12O5H+			360.05	13CC9H14O14H+			246.057
214.101	C10H15O4NH+			361.278	C23H36O3H+			246.104
214.225	13CC13H28OH+			363.292	C23H38O3H+			247.101
214.905				365.31	C23H40O3H+			247.123
215.084	C6H14O8H+			367.325	C23H42O3H+			247.237
215.101	C14H14O2H+			369.131	C16H20O8N2H+			248.072
215.203	C13H26O2H+			369.338	C23H44O3H+			248.099
215.914				371.111		D5		248.136
216.082	C9H13O5NH+			372.111		D5		249.096
217.067	C13H12O3H+			373.111		D4TOH		249.109
217.084	C13H12O3H+			374.099		D4TOH		250.087
217.107	C10H16O5H+			375.099	C15H18O11H+			251.101
217.128	C14H16O2H+			375.298	C28H38H+			251.154
217.142	C11H20O4H+			376.103	C11H21O13NH+			251.199
218.089	13CC12H12O3H+			377.307	C24H40O3H+			252.061
219.078	C9H14O6H+			379.324	C24H42O3H+			252.096
219.171	C11H22O4H+			381.33	C26H40N2H+			253.106
219.204	C16H26H+			383.333	C23H42O4H+			253.181
220.084	C8H13O6NH+			384.332	C23H45O3NH+			254.102
220.102	C9H17O5NH+			385.348	C27H44OH+			255.102
220.164	C10H21O4NH+			387.31	C22H42O5H+			255.207
220.179	C11H25O3NH+			389.297	C25H40O3H+			256.105
221.095	C9H16O6H+			391.285	C20H38O7H+			256.245
221.114	C9H16O6H+			392.289	13CC19H38O7H+			256.281
221.155	C14H20O2H+			393.326	C27H40N2H+			257.115
221.169	C14H20O2H+			395.362	C29H46H+			257.242
221.24				397.373	C29H48H+			258.116
222.082	C7H20O2H+			399.369	C28H46OH+			258.245
222.097	C8H15O6NH+			401.217	C16H32O11H+			259.1
222.145	13CC8H20O4N2H+			402.219	C19H31O8NH+			259.236
222.243				403.231	C20H34O8H+			261.144
223.078		D3		405.323	C22H44O6H+			261.243
224.078		D3		407.354	C26H46O3H+			262.123
225.06		D2TOH		409.37	C26H48O3H+			263.108
226.062		D2TOH		411.389	C26H50O3H+			264.113
227.051	C10H10O6H+			413.394	C26H52O3H+			265.113
227.079	C14H10O3H+			415.035	C12H14O16H+			265.122
227.209	C13H26ON2H+			416.029	C11H13O16NH+			266.107
227.245	C15H30OH+			417.035	C15H12O14H+			266.274
228.056	13CC9H10O6H+			418.022	13CC9H12O16N2H+			267.024
228.078	C10H13O5NH+			419.315	C22H42O7H+			267.031
228.248	13CC14H30OH+			420.314	C21H41O7NH+			267.158
229.039	C9H8O7H+			421.348	C30H44OH+			268.118
229.054	C9H8O7H+			423.376	C29H46N2H+			269.119
229.075	C10H12O6H+			425.383	C30H48OH+			269.141
229.095	C13H12O2N2H+			427.394	C30H50OH+			269.174
229.115	C11H16O5H+			429.097		D6f		270.102
229.214	C13H28ON2H+			430.084		D6f		270.104
229.23	C13H28ON2H+			431.091		D5TOHf		271.109
230.032	13CC8H8O7H+			432.087		D5TOHf		271.19
230.053	C9H11O6NH+			433.07	C16H16O14H+			271.247
230.075	13CC5H12O9H+			434.074	13CC15H16O14H+			272.025
230.093	C10H15O5NH+			437.403	C28H52O3H+			272.114
230.124	C11H19O4NH+			439.394	C31H50OH+			272.132
230.234	13CC12H28ON2H+			441.413	C31H52OH+			272.241
231.068	C6H14O9H+			443.445	C28H58O3H+			273.059
231.095	C10H14O6H+			445.12		D6		273.118
231.127	C11H18O5H+			446.136		D6		273.132
231.229	C14H30O2H+			447.136		D5TOH		273.15
232.028	13CC11H6O5H+			448.119		D5TOH		273.24
232.043	C8H9O7NH+			449.114	C14H24O16H+			274.032
232.075	13CC12H10O4H+			450.127	C13H23O16NH+			274.114
232.094	13CC8H14O5N2H+			451.411	C29H54O3H+			275.108
232.11	C10H17O5NH+			453.422	C31H52N2H+			275.266
233.103	C10H16O6H+			455.432	C31H54N2H+			276.11
233.12	C10H16O6H+			457.447	C32H56OH+			277.107
233.135	C14H16O3H+			461.33	C28H44O5H+			278.111
233.218	C17H28H+			463.415	C30H54O3H+			279.122
234.1	13CC9H16O6H+			465.435	C30H56O3H+			279.161
234.12	C10H19O5NH+			467.441	C30H58O3H+			279.177
235.108	C12H14O3N2H+			469.453	C32H56N2H+			280.12
235.144	C18H18H+			471.475	C30H62O3H+			281.048	D4f
235.168	C15H22O2H+			475.017				281.119
235.214	C15H26N2H+			479.472	C35H58H+			282.05	D4f
235.233				481.466	C31H60O3H+			282.124
236.099	13CC12H14O4H+			483.474	C31H62O3H+			283.052	D3TOHf
236.13	13CC13H18O3H+			485.492	C31H64O3H+			283.242
236.162	13CC9H22O4N2H+			489.051				284.051	D3TOHf
237.11	C9H16O7H+			490.047				284.1
237.136	C14H20O3H+			491.044	C18H18O16H+			284.115
237.175	C11H24O5H+			493.477	C36H60H+			284.279
237.235	C15H28N2H+			495.487	C36H62H+			285.173
238.098	C8H15O7NH+			497.485	C34H60N2H+			285.273
238.162	13CC17H20H+			499.502	C34H62N2H+			286.056
238.24	13CC14H28N2H+			503.109		D7f		286.275
239.106	C16H14O2H+			504.106		D7f		286.985
239.125	C9H18O7H+			505.093		D6TOHf		287.119
239.245	C16H30OH+			506.093		D6TOHf		287.191
240.1	13CC10H14O4N2H+			507.093	C19H22O16H+			287.265
240.246	C15H29ONH+			509.5	C37H64H+			288.99
241.1	C15H12O3H+			511.506	C33H66O3H+			289.025
241.131	C15H16ON2H+			513.514	C35H64N2H+			289.127
241.229	C14H28ON2H+			519.141		D7		289.148
241.254	C16H32OH+			520.144		D7		289.277
242.091	C11H15O5NH+			521.132		D6TOH		290.108
242.259	C15H31ONH+			522.133		D6TOH		290.121
243.097	C15H14O3H+			523.138	C20H26O16H+			291.107
243.119	C15H14O3H+			524.135	C19H25O16NH+			292.103
243.244	C14H30ON2H+			531.463	C31H62O6H+			294.103
244.092	C10H13O6NH+			533.513	C39H64H+			294.307
244.11	C11H17O5NH+			535.531	C39H66H+			295.103
244.252	13CC13H30ON2H+			537.515	C37H64N2H+			295.237
245.063	C10H12O7H+			545.516	C33H68O5H+			296.106
245.082	C7H16O9H+			549.017				296.141
245.102	C11H16O6H+			561.527	C37H68O3H+			297.091	D4
245.131	C15H16O3H+			563.073				297.161
245.255	C14H32ON2H+			565.059				297.24
246.102	C10H15O6NH+			566.055				298.09	D4
246.122	C11H19O5NH+			567.051				299.084	D3TOH
247.104	C14H14O4H+			568.058				299.196
247.132	C15H18O3H+			577.134		D8f		299.268
247.149	C12H22O5H+			578.144		D8f		300.075	D3TOH
247.221	C16H26N2H+			579.119		D7TOHf		300.197
247.242	C18H30H+			579.322				301.085
248.103	C10H17O6NH+			580.118		D7TOHf		301.212
248.122	C10H17O6NH+			581.108				301.27
248.244	13CC17H30H+			582.105				302.062
249.099	C10H16O7H+			583.103				302.214
249.116	C10H16O7H+			584.111				303.024
249.152	C11H20O6H+			585.072				303.222
249.267	C18H32H+			591.192	C25H34O16H+			304.029
250.098	C9H15O7NH+			593.194		D8		304.227
250.129	C10H19O6NH+			594.17		D8		305.022
250.156	13CC13H20O2N2H+			595.162		D7TOH		305.12
250.175	13CC18H20H+			596.157		D7TOH		305.228
251.099	C10H18O7H+			597.148				306.025
251.12	C10H18O7H+			598.152				306.128
251.15	C18H18OH+			599.142				307.145
251.173	C15H22O3H+			607.42	C35H58O8H+			307.217
252.111	C9H17O7NH+			610.166	C25H39O16NH+			308.145
252.137	13CC12H18O3N2H+			612.19	C25H41O16NH+			308.314
252.162	C14H21O3NH+			623.046				309.115
253.116	C13H16O5H+			625.029				309.248
253.144	C18H20OH+			626.034				309.994
253.17	C18H20OH+			637.098				310.1
253.189	C19H24H+			639.084				310.116
253.213	C16H28O2H+			640.093				311.154
253.271	C16H32N2H+			641.073				311.259
254.116	13CC11H16O4N2H+			642.083				311.294
254.162	13CC17H20OH+			643.074				313.205
254.276	C17H35NH+			651.16		D9f		313.299
255.112	C16H14O3H+			652.157		D9f		314.09
255.24	C16H30O2H+			653.142		D8TOHf		314.201
255.264	C17H34OH+			654.128		D8TOHf		314.296
256.112	C12H17O5NH+			655.13				315.228
256.255	C16H33ONH+			656.119				315.286
257.095	C12H16O6H+			657.121				316.23
257.259	C16H32O2H+			658.117				317.128
258.073	13CC9H12O6N2H+			659.084				317.226
258.105	C11H15O6NH+			663.432	C34H62O12H+			317.288
258.26	13CC15H32O2H+			667.19		D9		317.313
259.041	C10H10O8H+			668.182		D9		317.398
259.11	C15H14O4H+			669.18		D8TOH		318.23
259.137	C12H18O6H+			670.187		D8TOH		319.109
259.155	C13H22O5H+			671.204				319.143
259.27	C15H34ON2H+			672.19				319.23
260.032	C5H9O11NH+			673.158				321.155
260.068	C10H13O7NH+			686.21				321.246
260.108	C11H17O6NH+			697.081				322.334
261.119	C15H16O4H+			699.054				323.113
261.239	C19H32H+			700.041				323.264
261.258	C19H32H+			701.047				323.27
262.115	C11H19O6NH+			711.13				324.056
262.235	C14H31O3NH+			713.107				324.109
262.262	13CC18H32H+			714.107				325.174
263.121	C11H18O7H+			715.106				325.308
263.146	C12H22O6H+			716.086				326.288
263.175	C16H22O3H+			717.083				327.082
264.109	C10H17O7NH+			725.169		D10f		327.186
264.13	C11H21O6NH+			726.184		D10f		327.307
264.147	C11H21O6NH+			727.166		D9TOHf		328.094
265.134	C11H20O7H+			728.171		D9TOHf		328.309
265.158	C15H20O4H+			729.151				329.207
265.195	C16H24O3H+			730.152				329.31
265.234	C16H28ON2H+			731.151				330.214
265.268	C17H32N2H+			732.135				330.319
266.038	C8H11O9NH+			733.155				331.219
266.072	C9H15O8NH+			741.219		D10		331.32
266.118	C10H19O7NH+			742.203		D10		332.246
266.143	13CC10H20O7H+			743.21		D9TOH		333.193
266.166	C15H23O3NH+			744.186		D9TOH		333.244
266.499				745.197				333.318
267.069	C9H14O9H+			746.189				334.255
267.278	C18H34OH+			747.161				335.021
268.121	13CC13H18O5H+			771.101				335.117
268.281	C17H33ONH+			773.076				335.146
269.144	C14H20O5H+			785.144				335.258
269.164	C17H20ON2H+			787.133				336.277
269.28	C18H36OH+			789.111				336.347
270.123	C13H19O5NH+			790.115				337.19
270.285	13CC17H36OH+			791.137				337.287
271.125	C13H18O6H+			799.201				338.286
271.259				801.187				339.329
272.111	C12H17O6NH+			803.176				340.306
272.129	13CC11H18O5N2H+			804.186				341.023
272.161	C13H21O5NH+			805.181				341.094
272.274	13CC15H34ON2H+			806.166				341.321
273.113	C12H16O7H+			815.241		D11		342.325
273.242	C16H32O3H+			816.229		D11		343.324
273.264	C20H32H+			817.232		D11		344.326
274.116	C12H19O6NH+			820.182				344.432
274.138	C12H19O6NH+			847.11				345.214
274.161	C13H23O5NH+			849.082				345.308
274.259	C16H35O2NH+			859.197				345.333
274.285	C16H35O2NH+			861.149				346.34
275.27	C16H34O3H+			863.142				347.18
276.118	C11H17O7NH+			865.141				347.267
276.271	13CC15H34O3H+			873.238		D12f		349.283
277.12	C12H20O7H+			875.209				350.367
277.236	C15H32O4H+			877.206				351.303
277.283	C20H36H+			878.19				352.284
278.126	C11H19O7NH+			879.199				353.317
278.159	C12H23O6NH+			880.203				354.323
279.161	C16H22O4H+			889.26		D12		355.067	D5f
279.18	C13H26O6H+			919.227				355.339
280.151	C11H21O7NH+			921.124				356.069	D5f
280.178	13CC19H22OH+			933.178				356.337
281.082		D4f		935.194				357.068	D4TOHf
281.125	C14H16O6H+			937.192				357.341
281.16	C12H24O7H+			947.266		D13f		358.067	D4TOHf
281.282	C19H36OH+			949.239				358.353
281.321	C20H40H+			951.255				359.062
282.082		D4f		963.288		D13		359.169
282.114	C10H19O8NH+			977.322				359.279
282.136	13CC10H20O8H+			995.224				359.353
282.16	C15H23O4NH+			1007.22				360.073
283.055		D3TOHf		1009.21				360.36
283.284	C19H38OH+			1021.26		D14f		361.006
284.059		D3TOHf		1027.24				361.284
284.085	13CC12H14O7H+			1035.37				362.007
284.157	C14H21O5NH+			1037.32		D14		363.007
284.288	C18H37ONH+			1067.26				363.293
285.05	C12H12O8H+			1069.2				364.007
285.294	C18H36O2H+			1081.28				364.299
286.074	C8H15O10NH+			1083.24				365.002
286.166	C14H23O5NH+			1095.31		D15f		365.316
286.294	13CC17H36O2H+			1111.35		D15		366.115
287.132	C10H22O9H+			1128.36				366.32
287.199	C19H26O2H+			1141.21				367.129
287.234	C20H30OH+			1155.33				367.335
287.255	C17H34O3H+							368.134
287.298	C18H38O2H+							368.334
288.136	C13H21O6NH+							369.133
289.266	C20H32OH+							369.35
290.131	C12H19O7NH+							370.351
290.262	13CC19H32OH+							371.104	D5
291.148	C13H22O7H+							371.361
291.244	C18H30ON2H+							372.105	D5
292.127	C12H21O7NH+							372.362
293.142	C16H20O5H+							373.1	D4TOH
293.17	C17H24O4H+							373.296
293.206	C14H28O6H+							373.369
293.227	C18H28O3H+							374.099	D4TOH
293.271	C20H36OH+							374.284
294.13	C11H19O8NH+							374.373
294.204	C17H27O3NH+							375.098
294.288	13CC19H36OH+							375.309
295.101	C9H26O3H+							375.368
295.137	C12H22O8H+							376.301
295.308	C19H38N2H+							377.045
295.342	C21H42H+							377.319
296.143	C11H21O8NH+							378.046
296.181	C16H25O4NH+							378.321
297.102		D4						379.041
297.305	C18H36ON2H+							379.335
298.103		D4						380.044
299.084		D3TOH						380.337
300.082		D3TOH						381.349
301.077	C9H16O11H+							382.354
301.224	C19H28ON2H+							383.1
301.266	C20H32N2H+							383.365
302.08	C8H15O11NH+							384.369
303.074	C12H14O9H+							385.119
303.301	C18H38O3H+							385.375
304.301	C17H37O3NH+							386.379
305.163	C14H24O7H+							387.385
305.261	C19H32ON2H+							388.305
305.281	C21H36OH+							388.389
305.312	C22H40H+							389.325
307.18	C14H26O7H+							389.385
307.214	C15H30O6H+							390.317
307.276	C19H34ON2H+							391.31
307.302	C21H38OH+							392.315
308.161	C13H25O7NH+							393.352
309.14	C16H20O6H+							394.351
309.17	C17H24O5H+							395.366
309.336	C20H40N2H+							396.369
311.17	C13H26O8H+							397.379
311.332	C21H42OH+							398.382
312.165	13CC19H22O3H+							399.393
312.332	13CC20H42OH+							400.395
313.174	C20H24O3H+							401.403
313.289	C23H36H+							402.404
314.19	C16H27O5NH+							403.341
315.118	C14H18O8H+							403.399
315.14	C11H22O10H+							404.337
315.163	C19H22O4H+							405.357
315.241	C20H30ON2H+							406.353
316.1	13CC13H18O8H+							407.366
316.149	C14H21O7NH+							408.372
317.119	C10H20O11H+							409.379
317.143	C11H24O10H+							410.383
317.303	C19H40O3H+							411.392
318.123	C13H19O8NH+							412.399
319.229	C20H30O3H+							413.409
319.251	C17H34O5H+							414.41
319.276	C20H34ON2H+							415.031
321.197	C19H28O4H+							415.417
321.329	C21H40N2H+							416.429
323.137	C13H22O9H+							417.345
323.178	C18H26O5H+							417.416
323.359	C21H42N2H+							419.366
324.12	C12H21O9NH+							420.358
325.099	C15H16O8H+							421.381
325.129	C16H20O7H+							422.384
325.345	C22H44OH+							423.395
327.108	C11H18O11H+							424.405
327.156	C16H22O7H+							425.41
327.308	C24H38H+							426.415
328.119	C11H21O10NH+							427.423
329.058	C12H12O9N2H+							428.426
329.12	C15H20O8H+							429.089	D6f
329.192	C17H28O6H+							429.437
329.214	C21H28O3H+							430.085	D6f
329.293	C22H36N2H+							430.428
331.069	C13H14O10H+							431.083	D5TOHf
331.323	C20H42O3H+							431.385
333.091	C17H16O7H+							432.081	D5TOHf
333.142	C17H20O5N2H+							433.08
333.327	C22H40N2H+							433.389
335.097	C13H18O10H+							434.381
335.353	C22H42N2H+							435.031
337.383	C24H48H+							435.397
338.391	13CC23H48H+							436.031
339.365	C23H46OH+							436.394
340.359	13CC22H46OH+							437.028
341.123	C12H20O11H+							437.411
341.317	C25H40H+							438.416
342.115	C11H19O11NH+							439.423
343.091	C11H18O12H+							440.431
343.143	C16H22O8H+							441.438
343.334	C25H42H+							442.441
345.065	C10H16O13H+							443.447
345.091	C13H16O9N2H+							444.454
345.121	C15H20O9H+							445.116	D6
345.345	C25H44H+							445.394
347.362	C25H46H+							445.447
349.341	C24H44OH+							446.122	D6
349.371	C23H44N2H+							447.113	D5TOH
351.399	C25H50H+							447.4
352.398	C24H49NH+							448.114	D5TOH
353.378	C24H48OH+							448.4
354.37	13CC23H48OH+							449.411
355.096		D5f						450.419
356.093		D5f						451.071
357.084		D4TOHf						451.429
358.082		D4TOHf						452.432
359.063	C14H14O11H+							453.441
359.365	C26H46H+							454.444
360.066	13CC13H14O11H+							455.454
361.052	C12H12O11N2H+							456.455
361.379	C26H48H+							457.462
363.397	C26H50H+							458.465
365.041	C12H12O13H+							459.462
365.429	C26H52H+							461.41
366.435	13CC25H52H+							462.412
366.499								463.43
367.39	C25H50OH+							464.425
368.388	C24H49ONH+							465.441
369.129	C16H20O8N2H+							466.444
369.156	C18H24O8H+							467.457
369.367	C27H44H+							468.458
370.361	C23H47O2NH+							469.468
371.127		D5						470.469
371.366	C27H46H+							471.48
372.126		D5						472.484
373.112		D4TOH						473.297
374.111		D4TOH						473.411
375.103	C15H18O11H+							473.463
376.104	C11H21O13NH+							475.429
377.066	C14H16O12H+							476.435
377.095	C11H20O14H+							477.443
377.409	C25H48N2H+							478.445
378.402	13CC24H48N2H+							479.459
379.446								480.462
380.43	C26H53NH+							481.474
381.404	C26H52OH+							482.475
383.377	C28H46H+							483.486
384.382	C24H49O2NH+							484.499
385.39	C28H48H+							485.497
386.387	C24H51O2NH+							486.496
386.413	C24H51O2NH+							487.492
387.402	C28H50H+							489.448
388.403	13CC27H50H+							490.439
389.154	C21H24O7H+							491.459
389.406	C28H52H+							492.467
391.324	C25H42O3H+							493.469
391.372	C26H46O2H+							494.475
391.416	C26H50N2H+							495.477
392.327	13CC24H42O3H+							496.499
392.385	13CC25H50N2H+							497.497
393.457	C28H56H+							498.499
394.462	13CC27H56H+							499.508
395.408	C26H50O2H+							500.504
396.402	13CC25H50O2H+							501.434
397.404	C26H52O2H+							503.112	D7f
398.404	C25H51O2NH+							503.445
399.069	C15H14O11N2H+							503.473
399.42	C26H54O2H+							504.109	D7f
400.412	C25H53O2NH+							505.104	D7f
401.428	C25H52O3H+							505.461
402.427	13CC24H52O3H+							506.468
403.432	C29H54H+							507.485
405.449	C29H56H+							508.481
407.469	C29H58H+							509.05
408.431	C27H53ONH+							509.503
408.466	13CC28H58H+							510.498
409.413	C27H52O2H+							511.512
410.403	13CC26H52O2H+							512.509
411.423	C27H54O2H+							513.52
412.414	C26H53O2NH+							514.512
413.427	C27H56O2H+							515.312
415.056	C16H14O13H+							515.443
415.457								515.494
417.054	C12H16O16H+							517.472
417.45	C30H56H+							519.145	D7
419.353	C23H46O6H+							519.49
419.456	C30H58H+							520.141	D7
420.353	13CC30H46H+							521.13	D7
421.484	C30H60H+							521.504
422.487	13CC29H60H+							523.509
423.42	C28H54O2H+							524.517
423.452	C29H58OH+							525.088
425.434	C31H52H+							525.529
426.412	13CC30H52H+							526.514
427.44	C27H54O3H+							527.534
428.437	13CC26H54O3H+							531.475
429.121		D6f						533.489
430.121		D6f						533.509
431.106		D5TOHf						535.516
432.102		D5TOHf						537.533
433.091	C13H20O16H+							538.519
434.066	C12H19O16NH+							539.535
434.094	13CC12H20O16H+							541.547
435.057	C14H14O14N2H+							545.497
435.505	C31H62H+							545.503
437.461	C28H56ON2H+							547.511
439.448	C29H58O2H+							549.533
441.465	C29H60O2H+							551.549
443.496								553.55
445.15		D6						555.562
446.152		D6						561.525
447.135		D5TOH						563.535
447.382	C29H50O3H+							565.543
448.142		D5TOH						577.119	D8f
449.131	C14H24O16H+							578.12	D8f
450.134	C13H23O16NH+							579.115	D8f
451.117	C16H22O13N2H+							593.151	D8
453.461	C30H60O2H+							594.148	D8
455.489	C29H62ON2H+							595.155	D8
457.47	C33H60H+							651.146	D9f
457.508								652.135	D9f
459.514	C33H62H+							653.139	D9f
461.412	C34H52H+							667.165	D9
461.534								668.175	D9
466.598								725.138	D10f
469.504	C30H64ON2H+							741.212	D10
471.511	C34H62H+							814.941
483.513	C32H66O2H+							815.191
485.539								815.222	D11
487.535	C35H66H+							889.228	D12
489.089	C19H20O15H+
491.088	C17H18O15N2H+
493.068	C16H16O16N2H+
503.141		D7f
504.142		D7f
505.135		D6TOHf
506.132		D6TOHf
507.119	C19H22O16H+
508.121	C19H25O15NH+
509.12	C18H24O15N2H+
517.177	C19H32O16H+
519.176		D7
520.166		D7
521.163		D6TOH
522.163		D6TOH
523.157	C20H26O16H+
524.145	C20H29O15NH+
525.136	C18H24O16N2H+
536.188	13CC20H30O14N2H+
537.175	C22H32O15H+
538.178	C21H31O15NH+
539.174	C21H30O16H+
540.168	C20H29O16NH+
563.106
565.106
566.599	C37H75O2NH+
577.163		D8f
578.159		D8f
579.165		D7TOHf
580.148		D7TOHf
581.144
582.123
593.203		D8
594.183		D8
595.192		D7TOH
596.184		D7TOH
597.171
598.173
599.181
610.217	C25H39O16NH+
611.199
612.199
613.194
637.11
651.181		D9f
652.216		D9f
653.199		D8TOHf
654.204		D8TOHf
655.158
655.205
656.187
657.198
666.598	13CC39H76O5N2H+
667.233		D9
668.224		D9
669.208		D8TOH
670.235		D8TOH
671.203
672.226
684.236	13CC28H50O16N2H+
685.213
725.222		D10f
727.178		D9TOHf
741.265		D10
759.259
766.599	13CC39H80O11N2H+
799.192
799.251
